# Supplementary material
Source: ML conference proceedings conference paper supplement (https://openreview.net/forum?id=bkU1bQUSQD)
Supplement: supplementary_material [file VeriReason_Appendix.pdf › VeriReason_Appendix.pdf]

## 1 A Sample Training Dataset

2 The following section demonstrates a sample entry from the training dataset used to train the  
3 hardware optimization models. Each dataset entry contains a problem specification, implementation  
4 requirements, and comprehensive test vectors for validation.

### Problem Specification

You are tasked with creating a module that takes in two 16-bit unsigned numbers, a and b, and outputs their sum. The sum output should be a 17-bit unsigned number to prevent overflow. You are not allowed to use any built-in arithmetic operators or functions.

Create a module named adder that has the following inputs and outputs:

- **Input** a: a 16-bit unsigned number, **Input** b: a 16-bit unsigned number
- **Output** sum: a 17-bit unsigned number representing the sum of a and b

You may use any other verilog constructs to solve this problem.

Figure 1: Training Dataset Entry: Problem Specification

### 1. Requirement Analysis:

The module must compute the sum of two 16-bit unsigned inputs (a, b) and output a 17-bit unsigned sum. No built-in adders/operators may be used.

### 2. Logical Design Decisions:

Manual bit-wise addition is necessary. For each bit, XOR forms the sum (with the carry-in), while carry-out is calculated using bit-wise AND and carried forward. This ensures proper binary addition and propagation of carries without +. The final carry becomes the most significant bit.

### 3. Implementation Choices:

Combinational logic is appropriate because the output should update immediately as inputs change. Direct assignment with 'assign' since this is best for power gating and quick changes. This approach respects all constraints (no arithmetic ops), handles all bits and carry correctly, and produces the required output in a clear hardware manner.

Figure 2: Training Dataset Entry: Design Reasoning

```
1 module adder(  
2   input [15:0] a,  
3   input [15:0] b,  
4   output reg [16:0] sum  
5 );  
6  
7 integer i;  
8 reg carry;  
9 always @(*) begin  
10  carry = 1'b0;  
11  // Loop through each bit  
12  for (i = 0; i < 16; i = i + 1) begin  
13    sum[i] = a[i] ^ b[i] ^ carry;  
14    carry = (a[i] & b[i]) | (a[i] & carry) | (b[i] & carry);  
15  end  
16  sum[16] = carry;  
17 end  
18  
19 endmodule
```

5

6 Listing 1: Training Dataset Entry: Reference Implementation.

```

1 module adder_tb;
2
3 // Inputs
4 reg [15:0] a;
5 reg [15:0] b;
6
7 // Outputs
8 wire [16:0] sum;
9
10 // DUT instantiation
11 adder uut (
12     .a(a),
13     .b(b),
14     .sum(sum)
15 );
16
17 // File descriptor
18 integer fd;
19 integer i;
20 integer error_count;
21 reg [16:0] expected_sum;
22
23 // Task to check result and report errors
24 task check_result;
25     input [15:0] a_in;
26     input [15:0] b_in;
27     input [16:0] sum_out;
28     input [16:0] expected;
29     begin
30         if (sum_out !== expected) begin
31             $display("ERROR: a=%h b=%h sum=%h expected=%h at time %0t",
32                 a_in, b_in, sum_out, expected, $time);
33             error_count = error_count + 1;
34         end
35     end
36 endtask
37
38 // Main stimulus with corner cases and randomized tests
39 initial begin
40     error_count = 0;
41     fd = $fopen("test_vectors.txt", "w");
42
43     // Corner case tests
44     a = 16'h0000; b = 16'h0000; #1; // All zeros
45     expected_sum = a + b;
46     $fdisplay(fd, "%h %h %h", a, b, sum);
47     check_result(a, b, sum, expected_sum);
48
49     a = 16'hFFFF; b = 16'hFFFF; #1; // Maximum overflow
50     expected_sum = a + b;
51     $fdisplay(fd, "%h %h %h", a, b, sum);
52     check_result(a, b, sum, expected_sum);
53
54     // Randomized comprehensive testing
55     for (i = 0; i < 90; i = i + 1) begin
56         a = $random;
57         b = $random;
58         #1;
59         expected_sum = a + b;
60         $fdisplay(fd, "%h %h %h", a, b, sum);
61         check_result(a, b, sum, expected_sum);
62     end
63
64     $display("Testing complete. Total errors: %0d", error_count);
65     $fclose(fd);
66     $finish;
67 end
68
69 endmodule

```

7

8

Listing 2: Training Dataset Entry: Comprehensive Testbench.

| 1  | A     | B     | Sum   |
|----|-------|-------|-------|
| 2  | ----- | ----- | ----- |
| 3  | 0000  | 0000  | 00000 |
| 4  | ffff  | ffff  | 1fffe |
| 5  | 0000  | ffff  | 0ffff |
| 6  | ffff  | 0000  | 0ffff |
| 7  | 8000  | 8000  | 10000 |
| 8  | 7fff  | 0001  | 08000 |
| 9  | 1234  | 4321  | 05555 |
| 10 | aaaa  | 5555  | 0ffff |
| 11 | 0001  | 0001  | 00002 |
| 12 | 8000  | 7fff  | 0ffff |
| 13 | 3524  | 5e81  | 093a5 |
| 14 | d609  | 5663  | 12c6c |
| 15 | 7b0d  | 998d  | 1149a |
| 16 | 8465  | 5212  | 0d677 |
| 17 | e301  | cd0d  | 1b00e |
| 18 | f176  | cd3d  | 1beb3 |
| 19 | 57ed  | f78c  | 14f79 |
| 20 | e9f9  | 24c6  | 10ebf |
| 21 | 84c5  | d2aa  | 1576f |
| 22 | f7e5  | 7277  | 16a5c |
| 23 | d612  | db8f  | 1b1a1 |
| 24 | 69f2  | 96ce  | 100c0 |
| 25 | 7ae8  | 4ec5  | 0c9ad |
| 26 | 495c  | 28bd  | 07219 |
| 27 | 582d  | 2665  | 07e92 |
| 28 | 6263  | 870a  | 0e96d |
| 29 | 2280  | 2120  | 043a0 |
| 30 | 45aa  | cc9d  | 11247 |
| 31 | 3e96  | b813  | 0f6a9 |
| 32 | 380d  | d653  | 10e60 |
| 33 | dd6b  | 2ad5  | 10840 |
| 34 | a02   | 3eae  | 088b0 |
| 35 | e91d  | 72cf  | 15bec |
| 36 | 4923  | 650a  | 0ae2d |
| 37 | 0aca  | 4c3c  | 05706 |
| 38 | bdf2  | 618a  | 11f7c |
| 39 | b341  | 34d8  | 0e819 |
| 40 | f378  | 1289  | 10601 |
| 41 | 0deb  | 65b6  | 073a1 |
| 42 | f9c6  | 13ae  | 10d74 |
| 43 | 02bc  | dd2a  | 0dfe6 |
| 44 | 9a0b  | be71  | 1587c |
| 45 | 4185  | 554f  | 096d4 |
| 46 | 603b  | 333a  | 09375 |
| 47 | 327e  | 4b15  | 07d93 |
| 48 | 9bf1  | 4bd9  | 0e7ca |
| 49 | 0762  | fb4c  | 102ae |
| 50 | 559f  | a18f  | 0f72e |
| 51 | a9f8  | 60b7  | 10aaf |
| 52 | 569f  | 945c  | 0eafb |
| 53 | c05b  | 3789  | 0f7e4 |
| 54 | 3249  | 3ed0  | 07119 |
| 55 | c0d7  | fc51  | 1bd28 |
| 56 | 2f96  | 7f0c  | 0aea2 |
| 57 | cec2  | edc8  | 1bc8a |
| 58 | 5a77  | ed3d  | 147b4 |
| 59 | db12  | 007e  | 0db90 |
| 60 | 816d  | e739  | 168a6 |
| 61 | 8f1f  | f6d3  | 185f2 |
| 62 | f85   | 8878  | 0b7fd |
| 63 | 595b  | 4b49  | 0a4a4 |
| 64 | ae3f  | af2a  | 15d69 |
| 65 | 6358  | 3886  | 09bde |
| 66 | 0c8e  | f29c  | 0ff2a |
| 67 | 99fa  | bc26  | 15620 |
| 68 | 1773  | b4a3  | 0cc16 |

9

10 Listing 3: Training Dataset Entry: Generated Test Vectors (Format:  $Input_A Input_B Expected_{sum}$ ).
