# Supplementary material
Source: ML conference proceedings conference paper supplement (https://openreview.net/forum?id=bkU1bQUSQD)

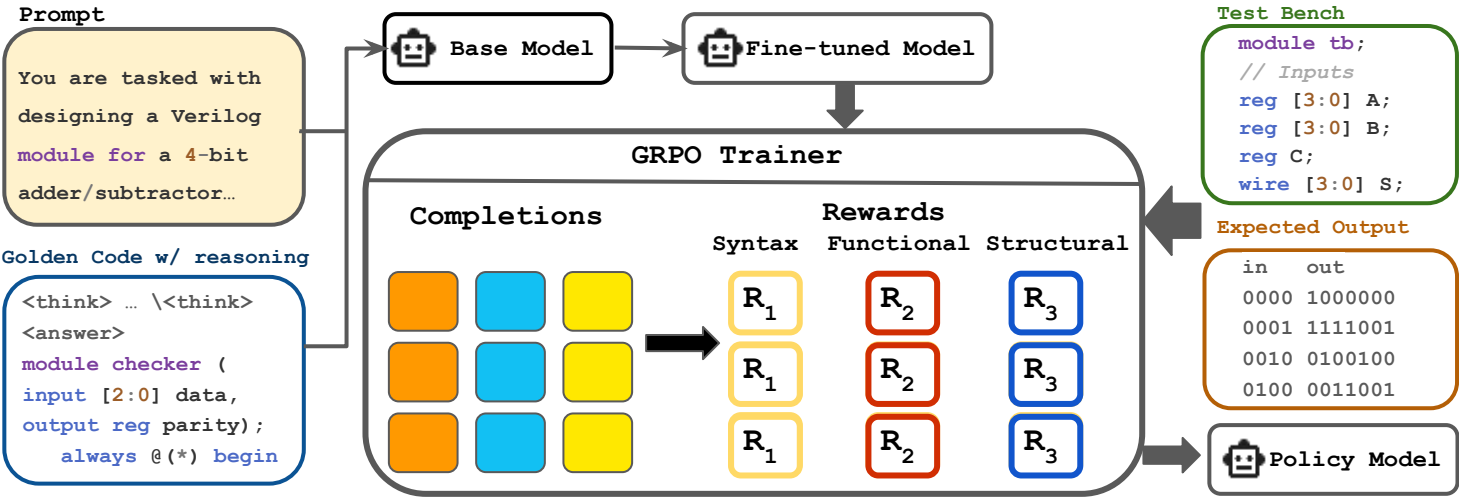

Supplement: supplementary_material [file Verireason_workflow.pdf › VeriReason-F7CF/assets/Verireason_workflow.pdf]
